# Supplementary material
Source: Springer Nature journal article supplement (https://www.springermedizin.de/resource/supplementary/13017_2009_145_MOESM1_ESM.pdf/9635564)

03.06.1964

AZ VUB

12.05.2004

17:44:28

10 cm



RXE 1440

L = 2047 W = 4096

Supplement: MOESM1 [file 9635564]
